# Supplementary material for: Cobalt Complex with Thiazole-Based Ligand as New Pseudomonas aeruginosa Quorum Quencher, Biofilm Inhibitor and Virulence Attenuator
Source: MDPI journal article supplement (doi:10.3390/molecules23061385), 2018-06-08
Supplement: s1 [file s1]

**Cobalt complex with thiazole-based ligand as new  
*Pseudomonas aeruginosa* quorum quencher, biofilm inhibitor,  
and virulence attenuator**

Anabela Borges, Manuel Simões, Tamara R. Todorović, Nenad R. Filipović and

Alfonso T. García-Sosa\*

t.alfonso@gmail.com

**Contents**

|                               |   |
|-------------------------------|---|
| Supplementary Figure S1 ..... | 2 |
| Supplementary Figure S2 ..... | 3 |

## Supplementary Figure S1

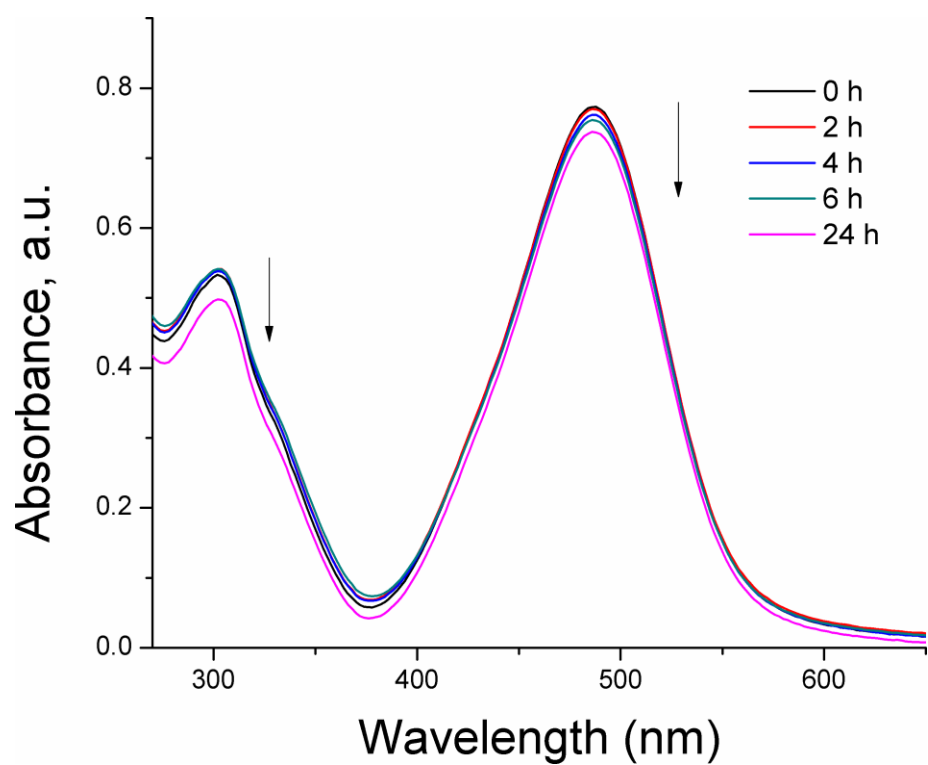

Caption. The UV-Vis spectroscopy spectra for the complex  $\text{Co}(\text{HL})_2$  in  $\text{DMSO}/\text{H}_2\text{O}$  6 : 100 (v/v) at 298 K. First measurement (black), after 24 h (pink).

## Supplementary Figure S2

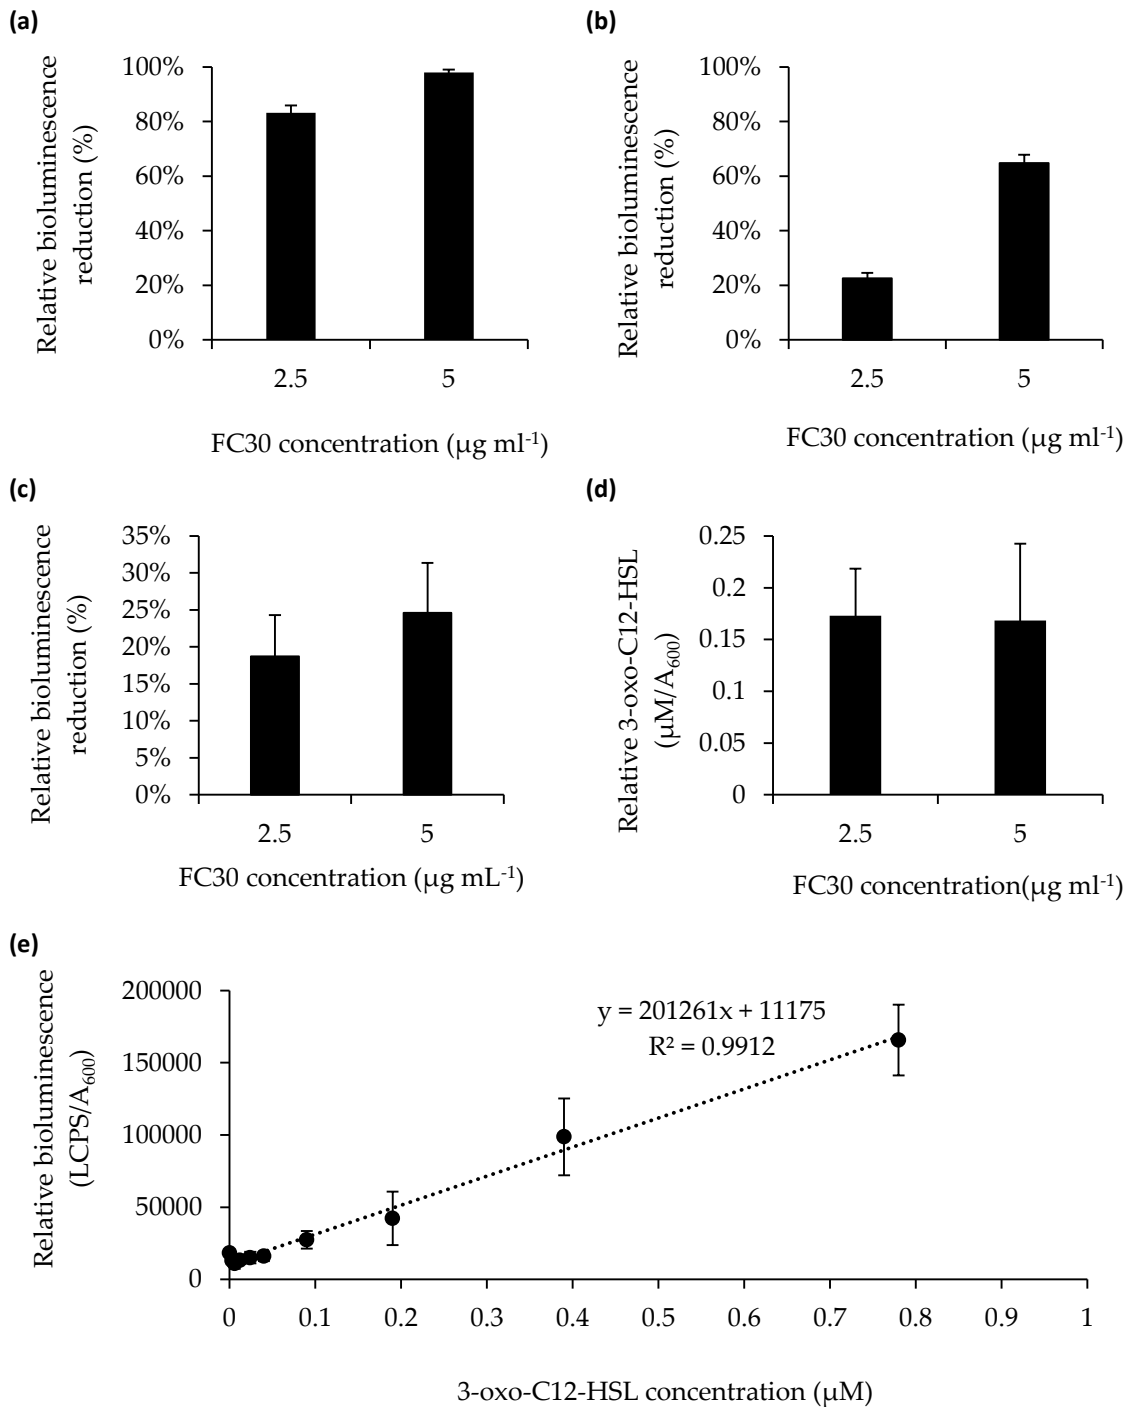

**Figure S1.** Positive controls with furanone C-30 (FC30) (known QS inhibitor) at 2.5 and 5  $\mu\text{g ml}^{-1}$ . Interference of FC30 with *P. aeruginosa* 3-oxo-C12-HSL-based QS system (a). Effect of FC30 on both 3-oxo-C12-HSL detection by PA14-R3 (b) and 3-oxo-C12-HSL production by PA14 wild-type (c). The concentration of 3-oxo-C12-HSL present in culture supernatant of PA14 wild-type strain previously

exposed to FC30 (2.5 and 5  $\mu\text{g mL}^{-1}$ ) was detected by PA14-R3 biosensor and quantitatively determined (d) based in an equation derived from calibration curve (e).
